# Supplementary figures and images for: MiR-34a is up-regulated in response to low dose, low energy X-ray induced DNA damage in breast cells
Source: Springer Nature journal article supplement (doi:10.1186/1748-717x-8-231), 2013-10-05

(A) **MCF-10A**

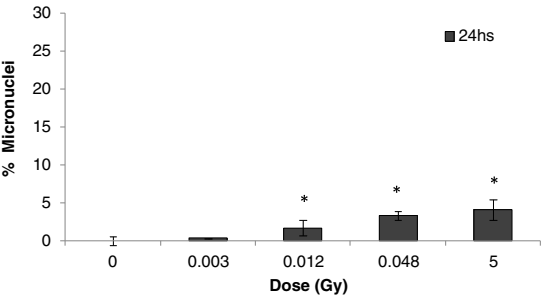

(B) **MCF-7**

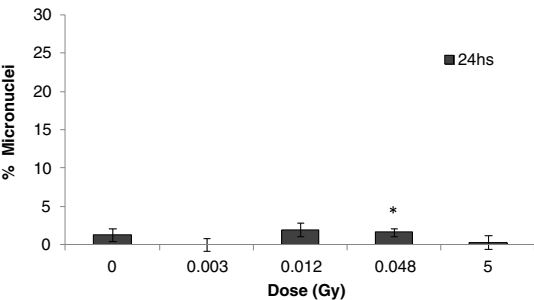

(C)

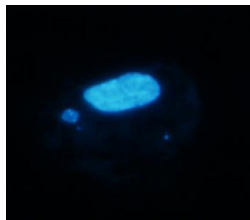

Supplement: 13014_2013_1262_MOESM2_ESM.pdf [file 13014_2013_1262_MOESM2_ESM.pdf]
